# Supplementary material
Source: PubMed Central journal article supplement (PMC1257720)

**a.**Multilobulated nuclei:  
Jurkat cells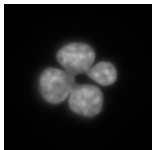Abnormal nuclei:  
SupT1 cells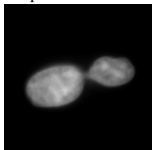Sezary-like nuclei:  
Hut102 cells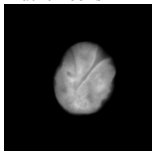Cerebriform nuclei:  
Hut102 cells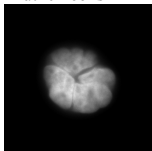**b.**

Class I

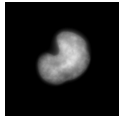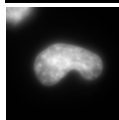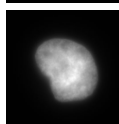

Class II

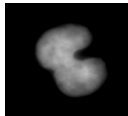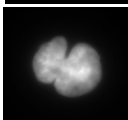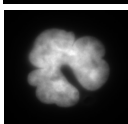

Class III

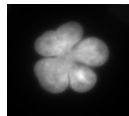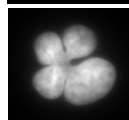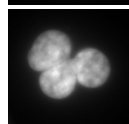**c.**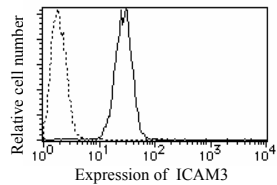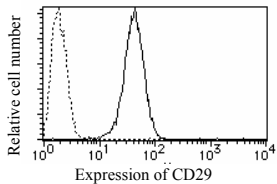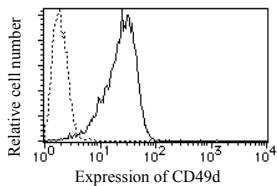

Supplement: pnas_0507184102_1.pdf [file pnas_0507184102_1.pdf]
