# Supplementary material
Source: PubMed Central journal article supplement (PMC1257720)

**a.**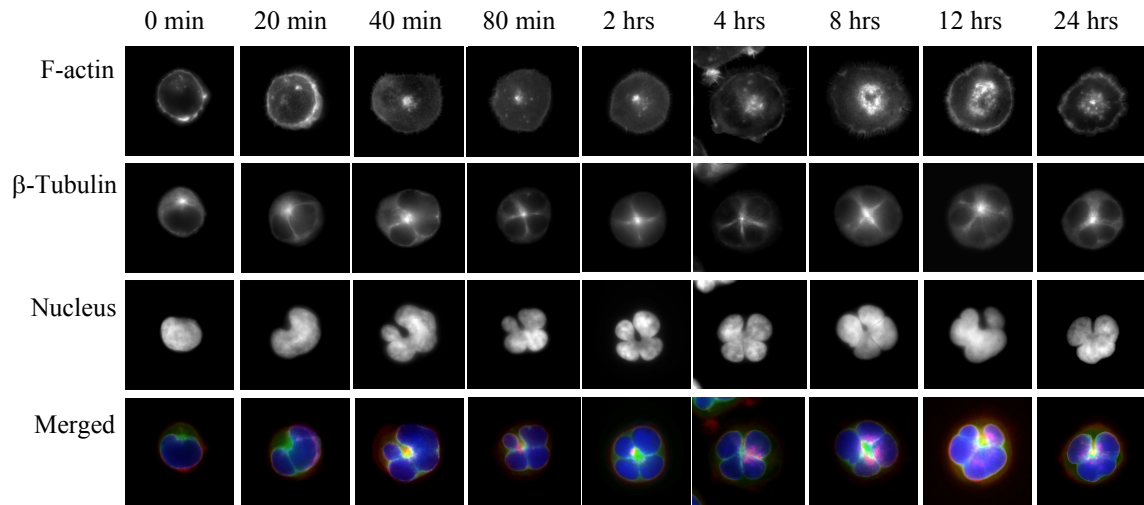**b.**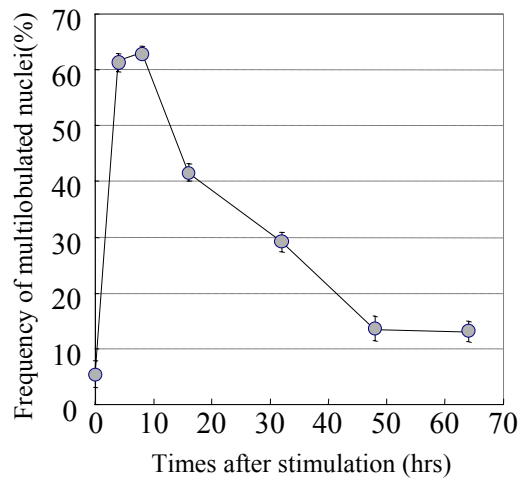**c.**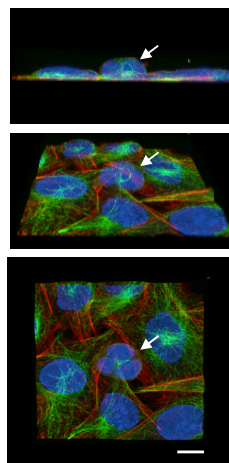

Supplement: pnas_0507184102_2.pdf [file pnas_0507184102_2.pdf]

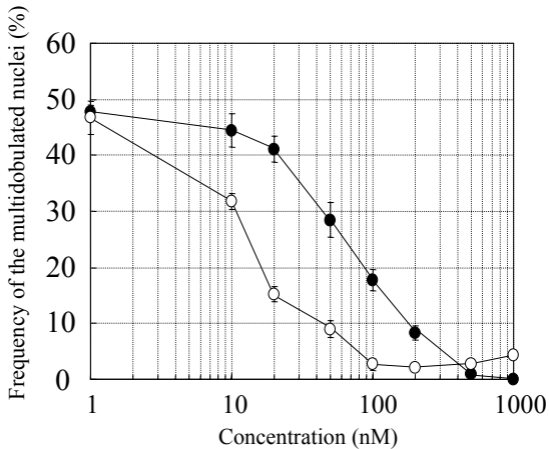

Supplement: pnas_0507184102_3.pdf [file pnas_0507184102_3.pdf]

**a.**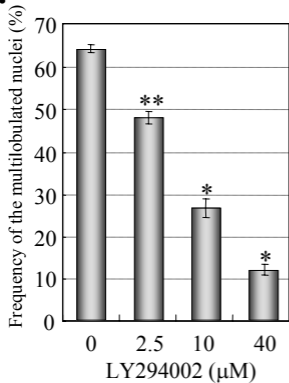**b.**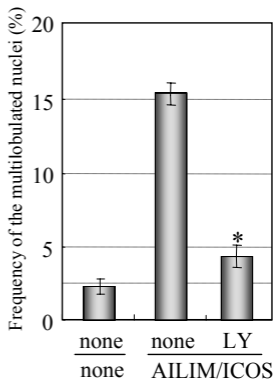

Supplement: pnas_0507184102_4.pdf [file pnas_0507184102_4.pdf]

**a.**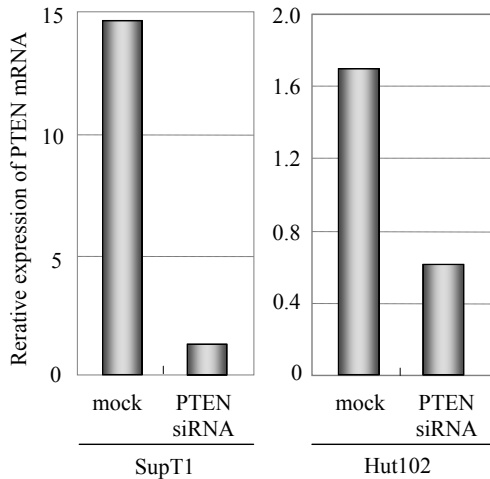**b.**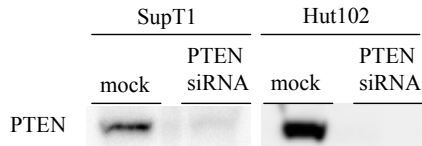

Supplement: pnas_0507184102_5.pdf [file pnas_0507184102_5.pdf]

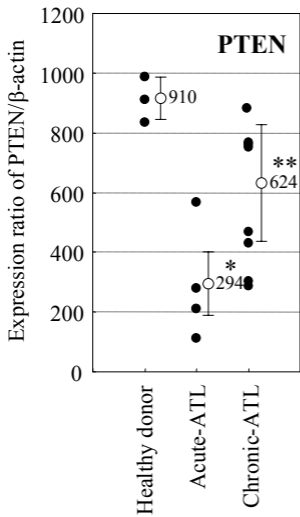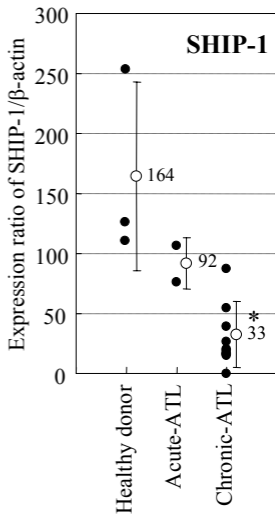

Supplement: pnas_0507184102_6.pdf [file pnas_0507184102_6.pdf]
